# Supplementary material
Source: publisher figshare collection journal article supplement (https://f1000.figshare.com/articles/dataset/_/1051645)

Original Western Blots (Figure 5)

Protective Proteins in Astrocytes

- (1) Control medium
- (2) hMNC<sup>apo sec</sup>
- (3) Positive control

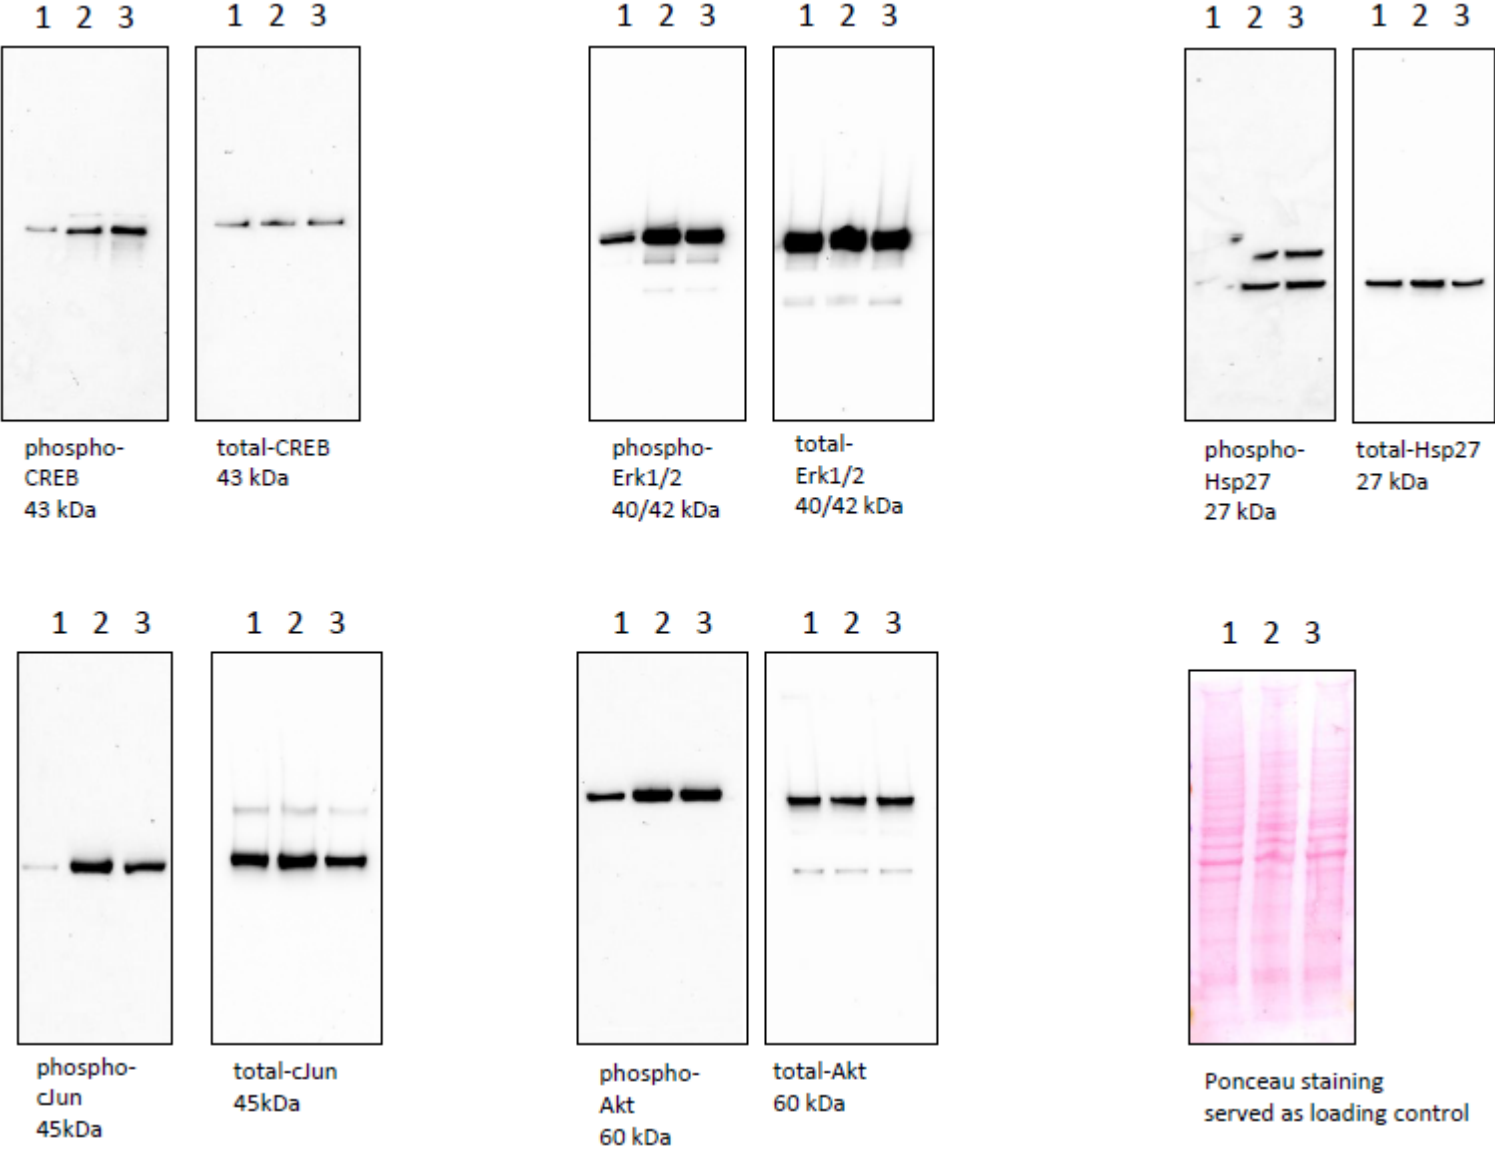

# Original Western Blots (Figure 5)

## Protective Proteins in Schwann Cells

- (1) Control medium
- (2) hMNC<sup>apo sec</sup>
- (3) Positive control

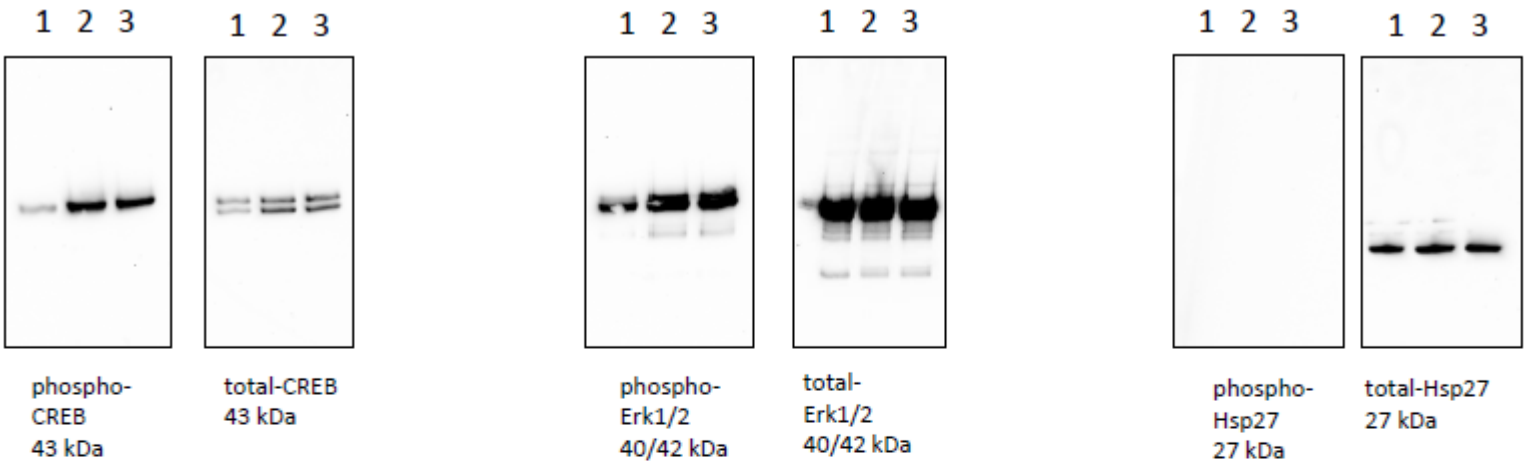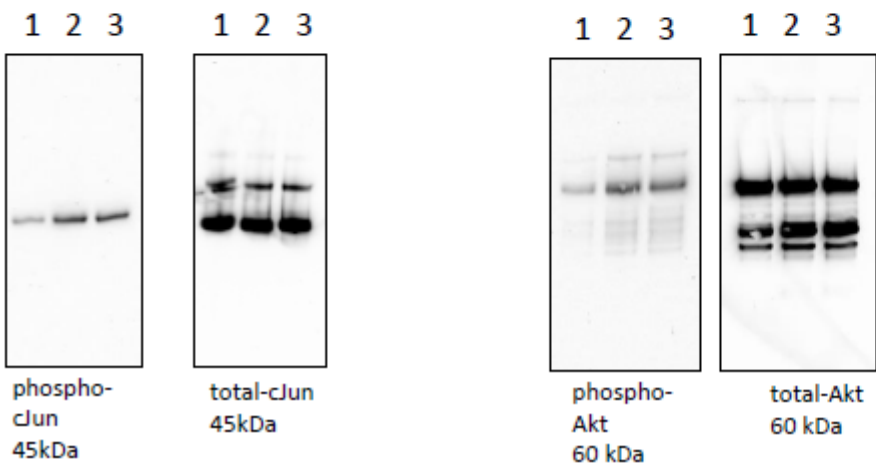

← Erk1/2; the same blot was re-probed with the total Akt antibody

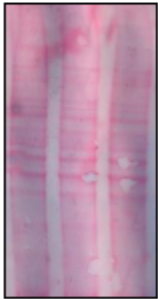

Ponceau staining served as loading control

**Original Western Blots (Figure 6)**  
***phospho-CREB in Astrocytes and Neurons***

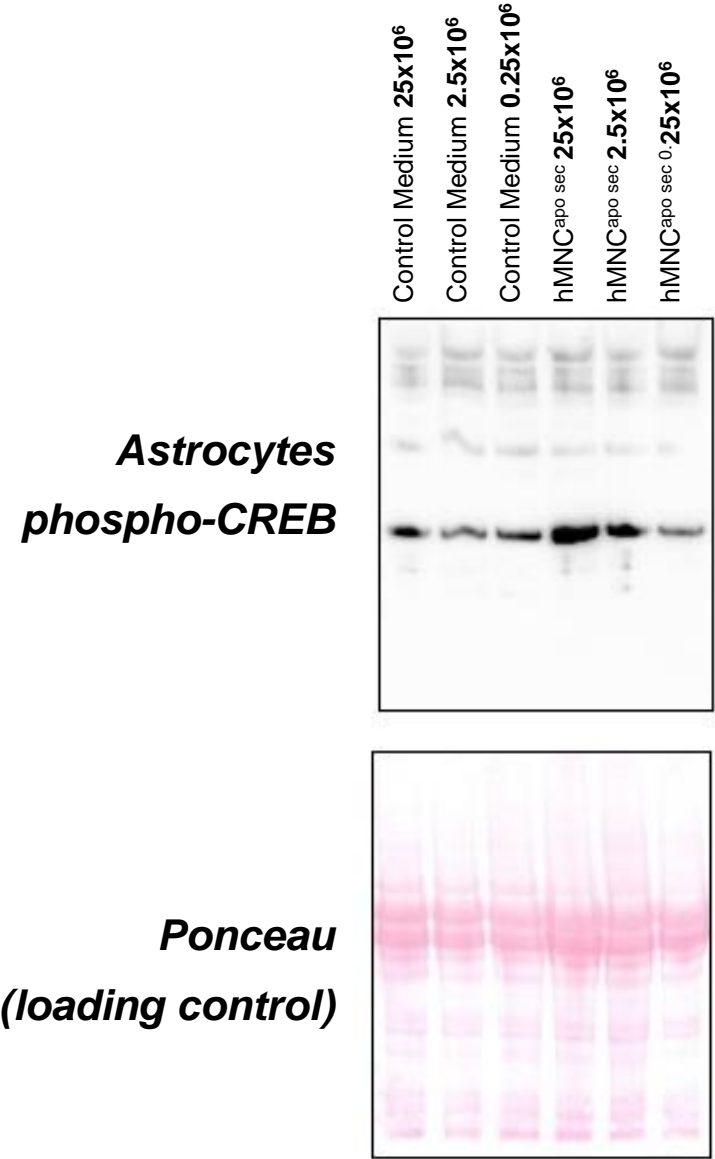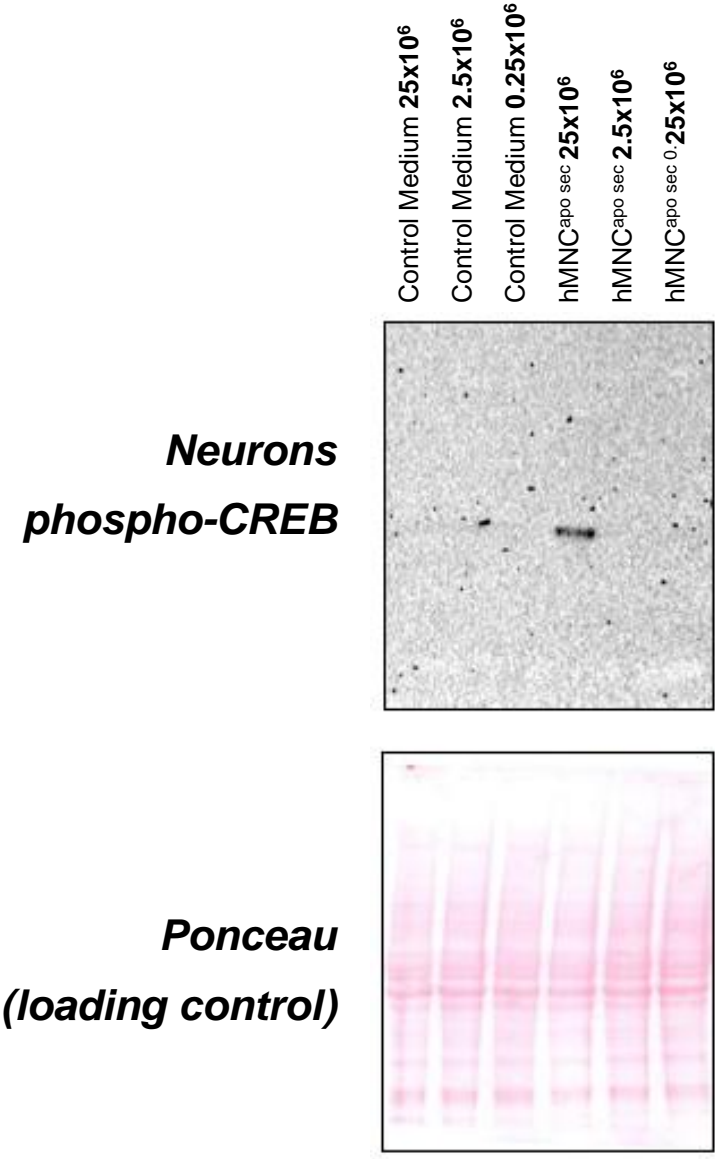

Supplement: Supplementary file 1 [file 1]
